# Supplementary material for: Hydrological modeling of the Peruvian–Ecuadorian Amazon Basin using GPM-IMERG satellite-based precipitation dataset
Source: Copernicus journal article supplement (doi:10.5194/hess-21-3543-2017), 2017-07-14
Supplement: Supplementary file 1 [file hess-21-3543-2017-supplement.pdf]

Supplement of Hydrol. Earth Syst. Sci., 21, 3543–3555, 2017  
<https://doi.org/10.5194/hess-21-3543-2017-supplement>  
© Author(s) 2017. This work is distributed under  
the Creative Commons Attribution 3.0 License.

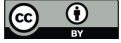

*Supplement of*

## **Hydrological modeling of the Peruvian–Ecuadorian Amazon Basin using GPM-IMERG satellite-based precipitation dataset**

**Ricardo Zubieta et al.**

*Correspondence to:* Ricardo Zubieta (rzubieta@igp.gob.pe)

The copyright of individual parts of the supplement might differ from the CC BY 3.0 License.

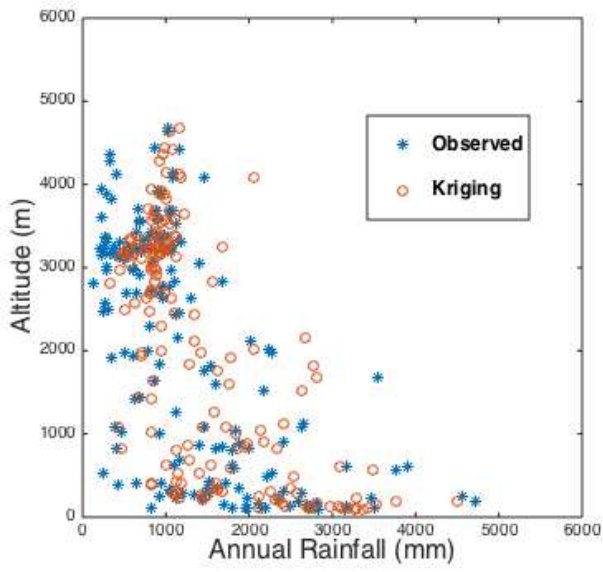

**Figure S1. a)** Relationship between altitude (m asl) and the observed and interpolated (kriging) annual rainfall (mm) for the 181 stations of the Peruvian and Ecuadorian Amazon basin for the 2014-2015 period.

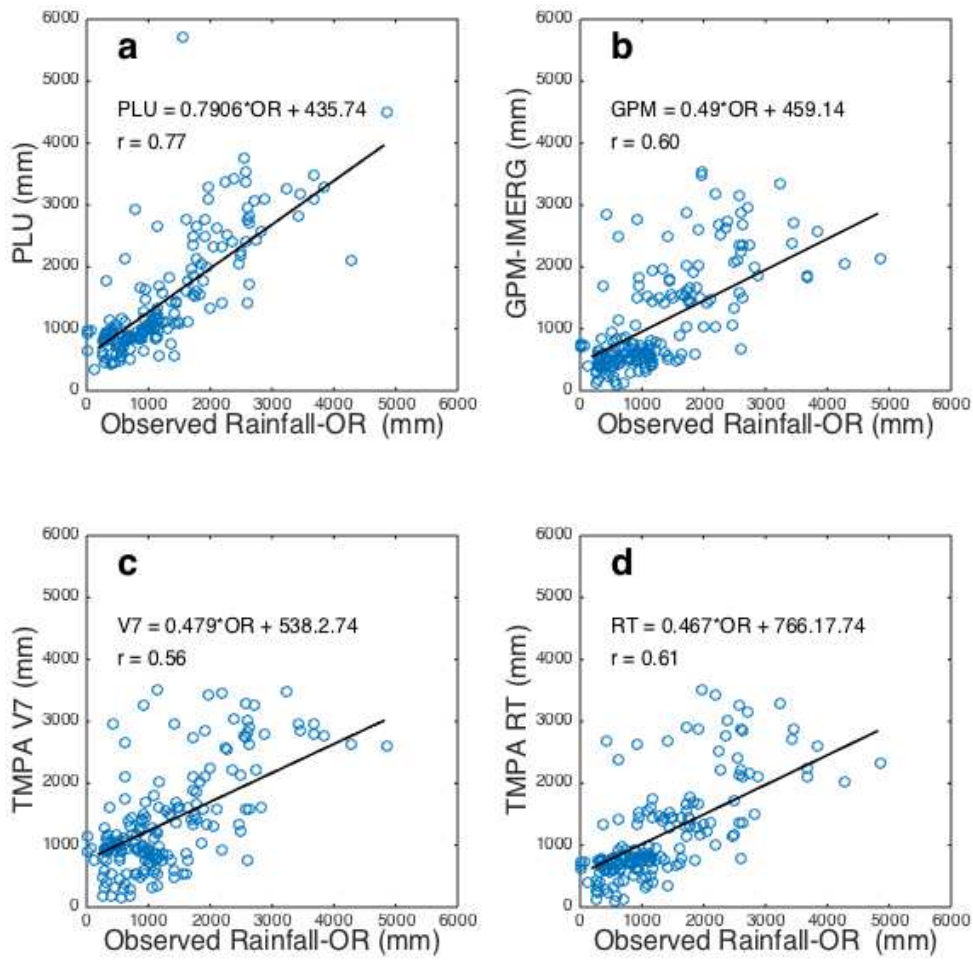

**Figure S2.** Regression line between the observed annual rainfall in 181 rainfall stations (OR) and annual rainfall obtained from a) interpolation (PLU), b) GPM-IMERG, c) TMPA V7, d) TMPA RT for the 2014-2015 period.

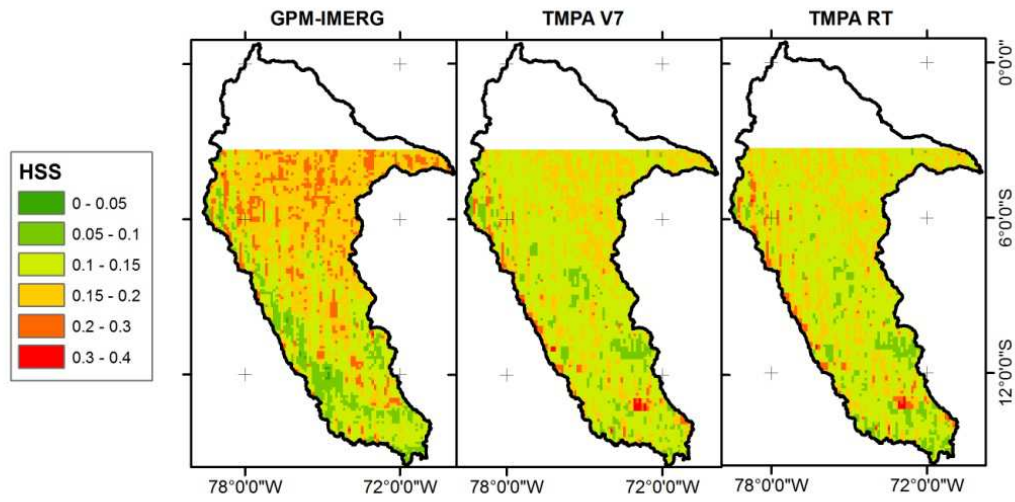

**Figure S3.** Spatial variability of the Heidke Skill Score from a) GPM-IMERG, b) TMPA V7 and c) TMPA RT against PLU ground observation, period from 2014 to 2015.
